# Supplementary material
Source: publisher figshare collection journal article supplement (https://frontiersin.figshare.com/ndownloader/files/22797464)
Supplement: Supplementary file [file 22797464]

## *Supplementary Material*

### 6 Linear Mixed-Effects Models: Pictures

Initial models for the prediction of eye movements in picture viewing contained three predictor variables ( $X_1$ : Valence Rating;  $X_2$ : Arousal Rating;  $X_3$ : Mood Rating) and the interaction between Valence and Arousal Rating ( $X_1X_2$ ; afterward called Valence:Arousal). Three dependent variables ( $Y_{si}$ ) were examined: Mean Saccade Amplitude (Table S9), Total Number of Fixations (Table S10), and Mean Fixation Duration (Table S11).

#### 6.1 Mean Saccade Amplitude

The following lmer specification corresponds to the initial model.

`m_initial = lmer(sqrt(Mean Saccade Amplitude) ~ 1 + Valence Rating3 * Arousal Rating3 + Mood Rating3 + (1|Subject) + (1|Item), data, REML=TRUE)`

Table S9

*Summary of the backward-elimination procedure for the prediction of Mean Saccade Amplitude*

|                             | $df_{\text{Change}}^1$ | $\chi^2_{\text{Change}}^1$ | log-likelihood <sup>1</sup> | $\chi^2$ | $df$ | $p\text{-value}^2$ |
|-----------------------------|------------------------|----------------------------|-----------------------------|----------|------|--------------------|
| <i>Step 1</i>               |                        |                            | 359.23                      |          |      |                    |
| Intercept                   |                        |                            |                             | 4730.52  | 1    | <.001              |
| Valence Rating <sup>3</sup> |                        |                            |                             | 0.39     | 1    | .53                |
| Arousal Rating <sup>3</sup> |                        |                            |                             | 0.78     | 1    | .38                |
| Mood Rating <sup>3</sup>    |                        |                            |                             | 0.34     | 1    | .56                |
| Valence:Arousal             |                        |                            |                             | 3.54     | 1    | .06                |
| <i>Step 2</i>               | 1                      | 0.35                       | 359.05                      |          |      | .56                |
| Intercept                   |                        |                            |                             | 4750.77  | 1    | <.001              |
| Valence Rating <sup>3</sup> |                        |                            |                             | 0.37     | 1    | .54                |
| Arousal Rating <sup>3</sup> |                        |                            |                             | 0.76     | 1    | .38                |
| Valence:Arousal             |                        |                            |                             | 3.47     | 1    | .06                |
| <i>Step 3</i>               | 1                      | 3.47                       | 357.32                      |          |      | .06                |
| Intercept                   |                        |                            |                             | 4865.81  | 1    | <.001              |
| Valence Rating <sup>3</sup> |                        |                            |                             | 0.06     | 1    | .80                |
| Arousal Rating <sup>3</sup> |                        |                            |                             | 0.39     | 1    | .53                |

|                             |   |      |        |         |   |       |
|-----------------------------|---|------|--------|---------|---|-------|
| <i>Step 4</i>               | 1 | 0.05 | 357.30 |         |   | .82   |
| Intercept                   |   |      |        | 4915.04 | 1 | <.001 |
| Arousal Rating <sup>3</sup> |   |      |        | 0.34    | 1 | .56   |
| <i>Step 5</i>               | 1 | 0.34 | 357.12 |         |   | .56   |
| Intercept                   |   |      |        | 4871.80 | 1 | <.001 |

*Notes.* <sup>1</sup> Likelihood ratio tests were performed to compare the model fit of nested models differing in one degree of freedom (i.e., one parameter). Model fits are reported in terms of the log-likelihood and chi-squared distributed likelihood ratio test statistic. The anova-function from the stats package (R Core Team, 2019) was applied.

<sup>2</sup> Fixed effects were checked with Type III sum of squares statistics using the Anova-function from the car package (Fox and Weisberg, 2019).

<sup>3</sup> Metrical variables were centered prior to analysis to facilitate interpretations.
